# Supplementary material
Source: PubMed Central journal article supplement (PMC3964370)
Supplement: NIHMS553385-supplement-01.pdf [file NIHMS553385-supplement-01.pdf]

## Appendix

**Supplementary Table.** Number of traditional cardiovascular risk factors in patients without known coronary artery disease presenting with first myocardial infarction

| <b>Non-ST-segment elevation myocardial infarction</b> |                        |                        |                          |                        |                        |                        |
|-------------------------------------------------------|------------------------|------------------------|--------------------------|------------------------|------------------------|------------------------|
|                                                       | <b>2003 (n = 7373)</b> | <b>2004 (n = 9197)</b> | <b>2005 (n = 12,612)</b> | <b>2006 (n = 8493)</b> | <b>2007 (n = 7241)</b> | <b>2008 (n = 6418)</b> |
| 0                                                     | 37 (0.5)               | 41 (0.4)               | 74 (0.6)                 | 74 (0.9)               | 80 (1.1)               | 72 (1.1)               |
| 1                                                     | 475 (6.4)              | 502 (5.5)              | 773 (6.1)                | 599 (7.0)              | 589 (8.1)              | 495 (7.7)              |
| 2                                                     | 1734 (23.5)            | 1936 (21.0)            | 2544 (20.2)              | 1950 (23.0)            | 1782 (24.6)            | 1562 (24.3)            |
| 3                                                     | 2622 (35.6)            | 3070 (33.4)            | 4015 (31.8)              | 2638 (31.1)            | 2293 (31.7)            | 2076 (32.3)            |
| 4                                                     | 1828 (24.8)            | 2503 (27.2)            | 3540 (28.1)              | 2116 (24.9)            | 1716 (23.7)            | 1515 (23.6)            |
| 5                                                     | 605 (8.2)              | 995 (10.8)             | 1489 (11.8)              | 987 (11.6)             | 683 (9.4)              | 615 (9.6)              |
| 6                                                     | 72 (1.0)               | 150 (1.6)              | 177 (1.4)                | 129 (1.5)              | 98 (1.3)               | 82 (1.3)               |
| <b>ST-segment elevation myocardial infarction</b>     |                        |                        |                          |                        |                        |                        |
|                                                       | <b>2003 (n = 4298)</b> | <b>2004 (n = 5401)</b> | <b>2005 (n = 6486)</b>   | <b>2006 (n = 5166)</b> | <b>2007 (n = 4910)</b> | <b>2008 (n = 4007)</b> |
| 0                                                     | 15 (0.3)               | 26 (0.5)               | 42 (0.6)                 | 42 (0.8)               | 36 (0.7)               | 33 (0.8)               |
| 1                                                     | 262 (6.1)              | 305 (5.6)              | 377 (5.8)                | 360 (7.0)              | 398 (8.1)              | 284 (7.1)              |
| 2                                                     | 1061 (24.7)            | 1112 (20.6)            | 1337 (20.6)              | 1185 (22.9)            | 1209 (24.6)            | 1031 (25.7)            |
| 3                                                     | 1458 (33.9)            | 1844 (34.1)            | 2115 (32.6)              | 1746 (33.8)            | 1685 (34.3)            | 1320 (32.9)            |
| 4                                                     | 1105 (25.7)            | 1452 (26.9)            | 1770 (27.3)              | 1276 (24.7)            | 1090 (22.2)            | 903 (22.5)             |
| 5                                                     | 342 (8.0)              | 576 (10.7)             | 735 (11.3)               | 466 (9.0)              | 413 (8.4)              | 370 (9.2)              |
| 6                                                     | 55 (1.3)               | 86 (1.6)               | 110 (1.7)                | 91 (1.8)               | 79 (1.6)               | 66 (1.6)               |

Data are presented as n (%).
